# Supplementary material
Source: MDPI journal article supplement (https://www.mdpi.com/2076-3298/10/9/151)
Supplement: s1 [file s1]

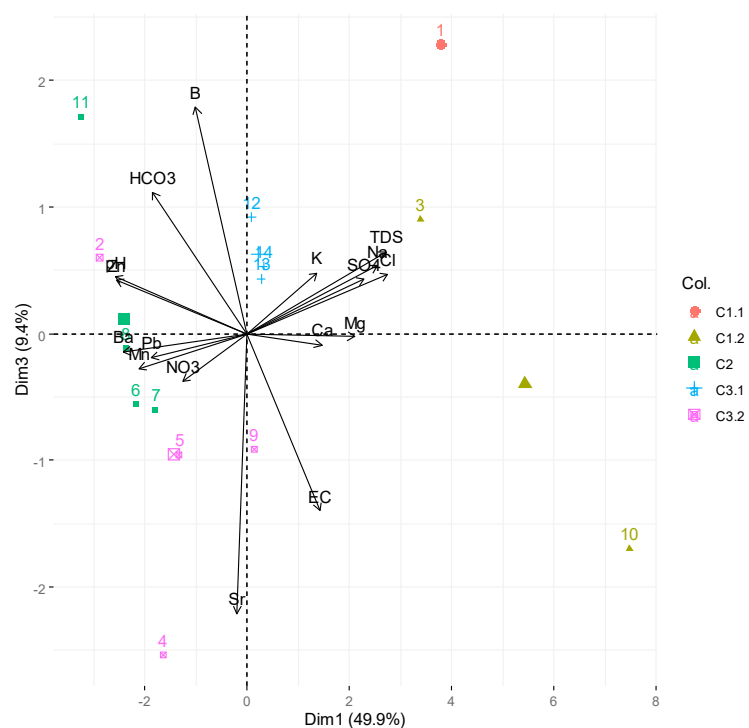

**Figure S1** - PCA loadings of the hydrochemical parameters on the PC1-PC3, and PCA scores of water samples classified according to hierarchical cluster analysis.

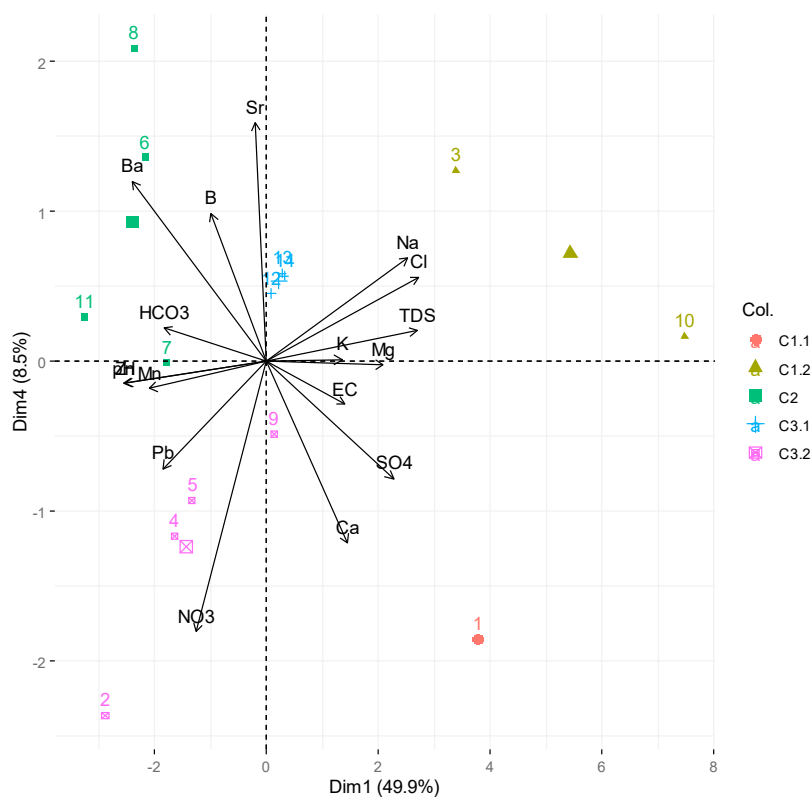

**Figure S2** - PCA loadings of the hydrochemical parameters on the PC1-PC4, and PCA scores of water samples classified according to hierarchical cluster analysis.

**Table S2** - Component loadings of four principal components, eigenvalue and variances.

|                                    | <b>Dim.1</b> | <b>Dim.2</b> | <b>Dim.3</b> | <b>Dim.4</b> |
|------------------------------------|--------------|--------------|--------------|--------------|
| <b>Cl</b>                          | 0.95         | -0.03        | 0.16         | 0.20         |
| <b>TDS</b>                         | 0.94         | 0.03         | 0.22         | 0.07         |
| <b>Na</b>                          | 0.89         | 0.27         | 0.19         | 0.24         |
| <b>SO<sub>4</sub><sup>2-</sup></b> | 0.80         | 0.30         | 0.15         | -0.27        |
| <b>Mg</b>                          | 0.73         | -0.61        | -0.01        | -0.01        |
| <b>Ca</b>                          | 0.51         | -0.67        | -0.03        | -0.42        |
| <b>EC</b>                          | 0.49         | 0.55         | -0.49        | -0.10        |
| <b>K</b>                           | 0.47         | 0.76         | 0.17         | 0.01         |
| <b>Sr</b>                          | -0.07        | -0.25        | -0.77        | 0.56         |
| <b>B</b>                           | -0.35        | 0.14         | 0.62         | 0.35         |
| <b>NO<sub>3</sub><sup>-</sup></b>  | -0.44        | -0.18        | -0.13        | -0.63        |
| <b>HCO<sub>3</sub><sup>-</sup></b> | -0.64        | -0.49        | 0.39         | 0.08         |
| <b>Pb</b>                          | -0.65        | 0.64         | -0.07        | -0.25        |
| <b>Mn</b>                          | -0.73        | 0.48         | -0.10        | -0.06        |
| <b>Ba</b>                          | -0.84        | -0.03        | -0.05        | 0.42         |
| <b>Zn</b>                          | -0.89        | 0.15         | 0.15         | -0.05        |
| <b>pH</b>                          | -0.90        | -0.22        | 0.16         | -0.05        |
| <b>Eigenvalue</b>                  | 8.47         | 2.93         | 1.60         | 1.45         |
| <b>Variance %</b>                  | 49.9         | 17.3         | 9.4          | 8.5          |
| <b>Cumulative %</b>                | 49.9         | 67.2         | 76.6         | 85.1         |
